# Supplementary material
Source: ML conference proceedings conference paper supplement (https://proceedings.neurips.cc/paper_files/paper/2022/hash/9cf904c86cc5f9ac95646c07d2cfa241-Abstract.html)
Supplement: Supplementary file 1 [file 9cf904c86cc5f9ac95646c07d2cfa241-Supplemental-Conference.zip]

Archive with 1 entries (1 files):
- snn_rat_robustness_enhanced_sp-Supplementary Material.pdf
